# Supplementary material
Source: publisher figshare collection journal article supplement (https://sage.figshare.com/ndownloader/files/23235362)
Supplement: Supplementary file 1 [file 23235362]

## Miami University

### Beliefs and attitudes about social distancing during the coronavirus pandemic

The purpose of this research is to examine beliefs and attitudes about social distancing during the coronavirus pandemic. This study is being conducted by <Insert Name(s) Here>. Participation in this research is restricted to persons 18 years of age or older and a resident of <Insert community here>. Completing the survey should take about 15 minutes. Your participation is voluntary, and you may stop at any time. The survey does not request information that would explicitly identify you. If you inadvertently include identifying information, such information will be removed from stored data. Only the researchers will have access to individual responses. Results of the survey will only be presented publicly as aggregate summaries. If you would like to receive a report of the general results of this project please click on the link at the end of the survey which will take you to a separate form to send us your contact information. The research survey and the contact survey are not linked. If you have any questions about this research or you feel you need more information to complete this survey, you can contact the lead researcher at <Insert email here>.

**For this set of questions please select the number that best describes your opinion. Remember there are no correct or incorrect answers.**

**The following questions are measured on scales of 1 to 7. Please circle ONE number on each scale from 1 to 7 that best matches your opinion. The numbers on the scale are as follows for many of the questions, *however*, please pay careful attention to each scale to understand how it is measured.**

---

|                  |                 |                 |                |                 |                 |                  |
|------------------|-----------------|-----------------|----------------|-----------------|-----------------|------------------|
| <b>1</b>         | <b>2</b>        | <b>3</b>        | <b>4</b>       | <b>5</b>        | <b>6</b>        | <b>7</b>         |
| <b>extremely</b> | <b>quite</b>    | <b>slightly</b> | <b>neither</b> | <b>slightly</b> | <b>quite</b>    | <b>extremely</b> |
| <b>OR</b>        |                 |                 |                |                 |                 |                  |
| <b>strongly</b>  | <b>somewhat</b> | <b>slightly</b> | <b>neither</b> | <b>slightly</b> | <b>somewhat</b> | <b>strongly</b>  |

---

**The first set of questions is about you Keeping at least a 6 foot distance between you and other people while in public, for the next two weeks.**

This **INCLUDES** contact with anyone when you are outside of your home. EVEN if you are visiting them in their home.

This **DOES NOT INCLUDE** your family members when you are in your home.

**Keeping at least a 6 foot distance between me and other people while in public, for the next two weeks is:**

- |                                                 |   |   |   |   |   |   |   |                                            |
|-------------------------------------------------|---|---|---|---|---|---|---|--------------------------------------------|
| 1. <u>Extremely</u><br><u>Worthless to me</u>   | 1 | 2 | 3 | 4 | 5 | 6 | 7 | <u>Extremely</u><br><u>Valuable to me</u>  |
| 2. <u>Not at all</u><br><u>Important to me</u>  | 1 | 2 | 3 | 4 | 5 | 6 | 7 | <u>Extremely</u><br><u>Important to me</u> |
| 3. <u>Extremely</u><br><u>Frustrating to me</u> | 1 | 2 | 3 | 4 | 5 | 6 | 7 | <u>Extremely</u><br><u>Enjoyable to me</u> |
| 4. <u>Not at all</u><br><u>Pleasant to me</u>   | 1 | 2 | 3 | 4 | 5 | 6 | 7 | <u>Extremely</u><br><u>Pleasant to me</u>  |

5. **Most people who are important to me want me to keep at least a 6 foot distance between me and other people while in public, for the next two weeks.**

Strongly Disagree   1   2   3   4   5   6   7   Strongly Agree

6. **People who are significant in my life think it is important for me to keep at least a 6 foot distance between me and other people while in public, for the next two weeks.**

Strongly Disagree   1   2   3   4   5   6   7   Strongly Agree

7. **Most people in my community will keep at least a 6 foot distance between them and other people when they are in public, for the next two weeks.**

Strongly Disagree   1   2   3   4   5   6   7   Strongly Agree

8. **Most people similar to me will keep at least a 6 foot distance between them and other people while in public, for the next two weeks.**

Strongly Disagree   1   2   3   4   5   6   7   Strongly Agree

9. **I believe I have the ability to keep at least a 6 foot distance between me and other people while in public, for the next two weeks.**

Strongly Disagree   1   2   3   4   5   6   7   Strongly Agree

10. **If I wanted to, I could keep at least a 6 foot distance between me and other people while in public, for the next two weeks.**

Strongly Disagree   1   2   3   4   5   6   7   Strongly Agree

11. **Whether or not I keep at least a 6 foot distance between me and other people while in public, for the next two weeks is entirely my decision.**

Strongly Disagree    1       2       3       4       5       6       7       Strongly Agree

12. **Keeping at least a 6 foot distance between me and other people while in public, for the next two weeks is completely up to me.**

Strongly Disagree    1       2       3       4       5       6       7       Strongly Agree

13. **I intend to keep at least a 6 foot distance between me and other people while in public, for the next two weeks.**

Strongly Disagree    1       2       3       4       5       6       7       Strongly Agree

14. **I plan to keep at least a 6 foot distance between me and other people while in public, for the next two weeks.**

Strongly Disagree    1       2       3       4       5       6       7       Strongly Agree

15. **I will keep at least a 6 foot distance between me and other people while in public, for the next two weeks.**

Strongly Disagree    1       2       3       4       5       6       7       Strongly Agree

The next set of questions is about you Avoiding public places where at least 10 people congregate, for the next 2 weeks.

This **INCLUDES** but is not limited to: Shopping centers, crowded outdoor spaces, playgrounds, restaurants/bars, church services, shopping centers, and other mass gatherings/events.

This **DOES NOT include** necessary trips to grocery stores or healthcare facilities.

**Avoiding public places where at least 10 people congregate, for the next two weeks is:**

- |                                                 |   |   |   |   |   |   |   |                                            |
|-------------------------------------------------|---|---|---|---|---|---|---|--------------------------------------------|
| 1. <u>Extremely</u><br><u>Worthless to me</u>   | 1 | 2 | 3 | 4 | 5 | 6 | 7 | <u>Extremely</u><br><u>Valuable to me</u>  |
| 2. <u>Not at all</u><br><u>Important to me</u>  | 1 | 2 | 3 | 4 | 5 | 6 | 7 | <u>Extremely</u><br><u>Important to me</u> |
| 3. <u>Extremely</u><br><u>Frustrating to me</u> | 1 | 2 | 3 | 4 | 5 | 6 | 7 | <u>Extremely</u><br><u>Enjoyable to me</u> |
| 4. <u>Not at all</u><br><u>Pleasant to me</u>   | 1 | 2 | 3 | 4 | 5 | 6 | 7 | <u>Extremely</u><br><u>Pleasant to me</u>  |

5. **Most people who are important to me want me to avoid public places where at least 10 people congregate, for the next two weeks.**

Strongly Disagree    1    2    3    4    5    6    7    Strongly Agree

6. **People who are significant in my life think it is important for me to avoid public places where at least 10 people congregate, for the next two weeks.**

Strongly Disagree    1    2    3    4    5    6    7    Strongly Agree

7. **Most people in my community will avoid public places where at least 10 people congregate, for the next two weeks.**

Strongly Disagree    1    2    3    4    5    6    7    Strongly Agree

8. **Most people similar to me will avoid public places where at least 10 people congregate, for the next two weeks.**

Strongly Disagree    1    2    3    4    5    6    7    Strongly Agree

9. **I believe I have the ability to avoid public places where at least 10 people congregate, for the next two weeks.**

Strongly Disagree    1    2    3    4    5    6    7    Strongly Agree

10. **If I wanted to, I could avoid public places where at least 10 people congregate, for the next two weeks.**

Strongly Disagree    1    2    3    4    5    6    7    Strongly Agree

11. **Whether or not I avoid public places where at least 10 people congregate, for the next two weeks is entirely my decision.**

Strongly Disagree    1       2       3       4       5       6       7       Strongly Agree

12. **Avoiding public places where at least 10 people congregate, for the next two weeks is completely up to me.**

Strongly Disagree    1       2       3       4       5       6       7       Strongly Agree

13. **I intend to avoid public places where at least 10 people congregate, for the next two weeks.**

Strongly Disagree    1       2       3       4       5       6       7       Strongly Agree

14. **I plan to avoid public places where at least 10 people congregate, for the next two weeks.**

Strongly Disagree    1       2       3       4       5       6       7       Strongly Agree

15. **I will avoid public places where at least 10 people congregate, for the next two weeks.**

Strongly Disagree    1       2       3       4       5       6       7       Strongly Agree

**This section will ask you about Staying home for the next 2 weeks.**

This **INCLUDES** staying home as much as you can.

This **INCLUDES** avoiding visiting family members and friends in their residence.

This **INCLUDES** avoiding or cancelling unnecessary travel plans.

This **DOES NOT INCLUDE** going out for necessary reasons, like for groceries, picking up takeout food, or going to the doctor if you are sick.

This **DOES NOT INCLUDE** going for walks or going to uncrowded outdoor spaces.

**Staying home for the next two weeks is:**

- |                                                 |   |   |   |   |   |   |   |                                            |
|-------------------------------------------------|---|---|---|---|---|---|---|--------------------------------------------|
| 1. <u>Extremely</u><br><u>Worthless to me</u>   | 1 | 2 | 3 | 4 | 5 | 6 | 7 | <u>Extremely</u><br><u>Valuable to me</u>  |
| 2. <u>Not at all</u><br><u>Important to me</u>  | 1 | 2 | 3 | 4 | 5 | 6 | 7 | <u>Extremely</u><br><u>Important to me</u> |
| 3. <u>Extremely</u><br><u>Frustrating to me</u> | 1 | 2 | 3 | 4 | 5 | 6 | 7 | <u>Extremely</u><br><u>Enjoyable to me</u> |
| 4. <u>Not at all</u><br><u>Pleasant to me</u>   | 1 | 2 | 3 | 4 | 5 | 6 | 7 | <u>Extremely</u><br><u>Pleasant to me</u>  |
- 
- |                                                                                                                   |                          |   |   |   |   |   |   |   |                       |
|-------------------------------------------------------------------------------------------------------------------|--------------------------|---|---|---|---|---|---|---|-----------------------|
| 5. <b>Most people who are important to me want me to stay home for the next two weeks.</b>                        | <u>Strongly Disagree</u> | 1 | 2 | 3 | 4 | 5 | 6 | 7 | <u>Strongly Agree</u> |
| 6. <b>People who are significant in my life think it is important for me to stay home for the next two weeks.</b> | <u>Strongly Disagree</u> | 1 | 2 | 3 | 4 | 5 | 6 | 7 | <u>Strongly Agree</u> |
| 7. <b>Most people in my community will stay home for the next two weeks.</b>                                      | <u>Strongly Disagree</u> | 1 | 2 | 3 | 4 | 5 | 6 | 7 | <u>Strongly Agree</u> |
| 8. <b>Most people similar to me will stay home for the next two weeks.</b>                                        | <u>Strongly Disagree</u> | 1 | 2 | 3 | 4 | 5 | 6 | 7 | <u>Strongly Agree</u> |
| 9. <b>I believe I have the ability to stay home for the next two weeks.</b>                                       | <u>Strongly Disagree</u> | 1 | 2 | 3 | 4 | 5 | 6 | 7 | <u>Strongly Agree</u> |
| 10. <b>If I wanted to, I could stay home for the next two weeks.</b>                                              | <u>Strongly Disagree</u> | 1 | 2 | 3 | 4 | 5 | 6 | 7 | <u>Strongly Agree</u> |
| 11. <b>Whether or not I stay home for the next two weeks is entirely my decision.</b>                             | <u>Strongly Disagree</u> | 1 | 2 | 3 | 4 | 5 | 6 | 7 | <u>Strongly Agree</u> |

12. **Staying home for the next two weeks is completely up to me.**

Strongly Disagree      1      2      3      4      5      6      7      Strongly Agree

13. **I intend to stay home for the next two weeks.**

Strongly Disagree      1      2      3      4      5      6      7      Strongly Agree

14. **I plan to stay home for the next two weeks.**

Strongly Disagree      1      2      3      4      5      6      7      Strongly Agree

15. **I will stay home for the next two weeks.**

Strongly Disagree      1      2      3      4      5      6      7      Strongly Agree

***Thank you for participating!***

**\*KEY TO SCORE EACH SURVEY**

Overall Attitudes: Question 1-4

-Instrumental Attitudes only: Question 1 & 2

-Experiential Attitudes only: Question 3 & 4

Overall Perceived Norms: Question 5-8

-Injunctive Norms: Question 5 & 6

-Descriptive Norms: Question 7 & 8

Overall Perceived Behavioral Control: Question 9-12

-Capacity: Question 9 & 10

-Autonomy: Question 11 & 12

Intentions: Question 13-15
